# Supplementary material for: Systemic Inflammation (C-Reactive Protein) in Older Chinese Adults Is Associated with Long-Term Exposure to Ambient Air Pollution
Source: MDPI journal article supplement (doi:10.3390/ijerph18063258), 2021-03-22
Supplement: s1 [file s1]

**Figure S1:** Percentage change (95% CI) in hs-CRP levels associated with 10  $\mu\text{g}/\text{m}^3$  increase in 5-years moving averages of air pollution.

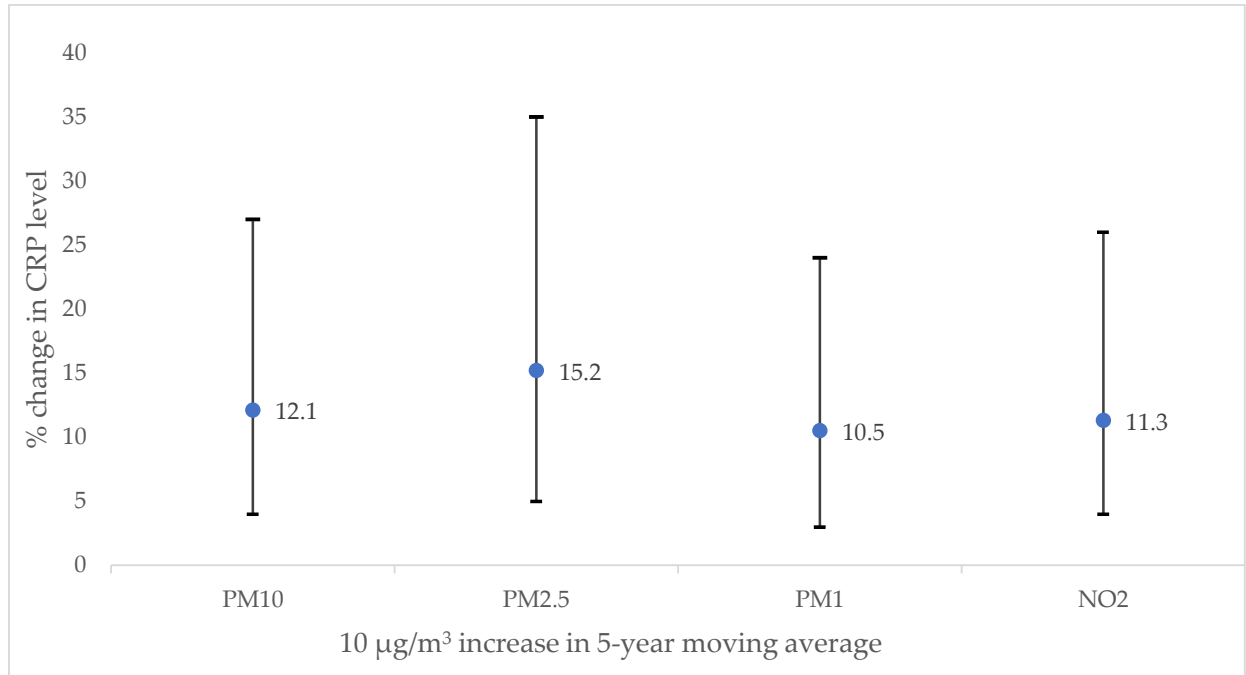

PM<sub>10</sub>, particulate matter with a diameter of 10  $\mu\text{m}$  or less; PM<sub>2.5</sub>, with a diameter of 2.5  $\mu\text{m}$  or less; PM<sub>1</sub>, particulate matter with a diameter of 1  $\mu\text{m}$  or less; NO<sub>2</sub>, nitrogen dioxide.

**Figure S2:** Percentage change (95% CI) in hs-CRP levels associated with 10  $\mu\text{g}/\text{m}^3$  increase in 1-year moving averages of air pollution.

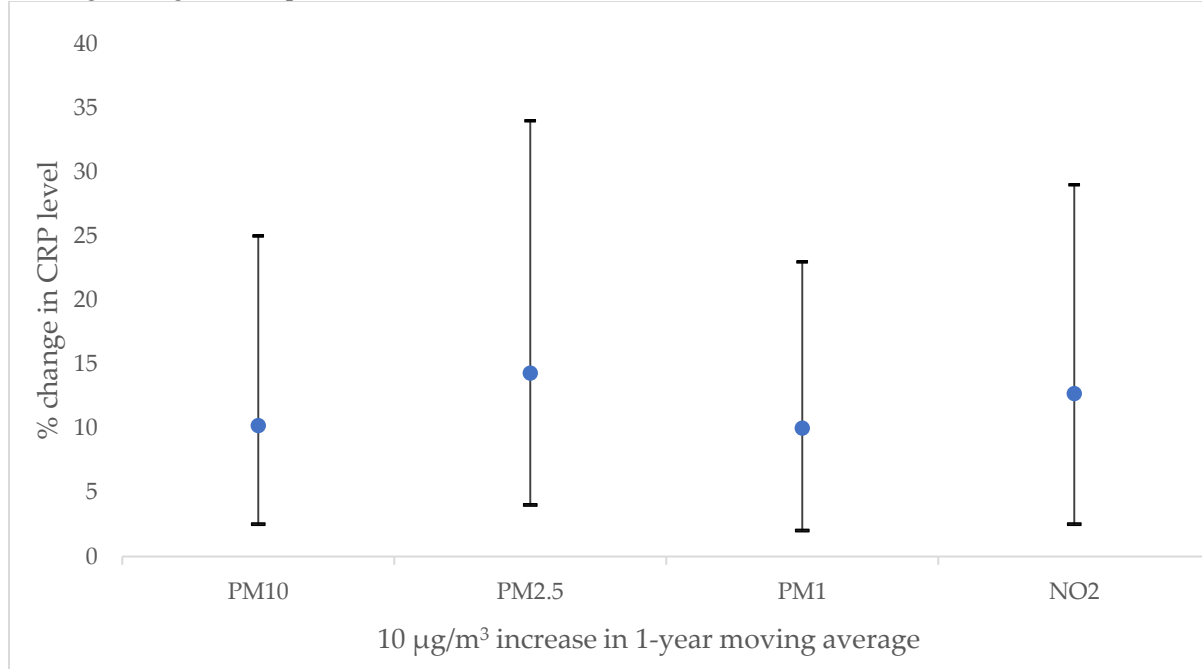

PM<sub>10</sub>, particulate matter with a diameter of 10  $\mu\text{m}$  or less; PM<sub>2.5</sub>, with a diameter of 2.5  $\mu\text{m}$  or less, PM<sub>1</sub>, particulate matter with a diameter of 1  $\mu\text{m}$  or less; NO<sub>2</sub>, nitrogen dioxide.

**Table S1.** Results of 10-fold cross-validation for PM<sub>1</sub>, PM<sub>2.5</sub>, PM<sub>10</sub>, and NO<sub>2</sub>.

| Pollutants        | Daily Model       |                               | Annual Averages   |                               |
|-------------------|-------------------|-------------------------------|-------------------|-------------------------------|
|                   | CV R <sup>2</sup> | RMSE                          | CV R <sup>2</sup> | RMSE                          |
| PM <sub>1</sub>   | 55%               | 20.5 $\mu\text{g}/\text{m}^3$ | 75%               | 8.8 $\mu\text{g}/\text{m}^3$  |
| PM <sub>2.5</sub> | 83%               | 18.1 $\mu\text{g}/\text{m}^3$ | 86%               | 6.9 $\mu\text{g}/\text{m}^3$  |
| PM <sub>10</sub>  | 78%               | 31.5 $\mu\text{g}/\text{m}^3$ | 81%               | 14.4 $\mu\text{g}/\text{m}^3$ |
| NO <sub>2</sub>   | 64%               | 12.4 $\mu\text{g}/\text{m}^3$ | 72%               | 6.5 $\mu\text{g}/\text{m}^3$  |

RMSE: Root mean square error; CV: cross-validation.

**Table S2.** Characteristics of the study participants and non-participants (without CRP sample).

|                                        | No<br>(n)  | %     | Yes<br>(n) | %     | p-value* |
|----------------------------------------|------------|-------|------------|-------|----------|
| <b>CRP</b>                             | 5,452      | 40.8% | 7,915      | 59.2% |          |
| <b>Age (mean, SD)</b>                  | 63.1 (9.6) |       | 63.2 (9.4) |       | 0.392    |
| <b>Sex</b>                             |            |       |            |       |          |
| Female                                 | 2,952      | 41.6% | 4,141      | 58.4% | 0.000    |
| Male                                   | 2,500      | 39.8% | 3,774      | 60.2% |          |
| <b>Smoking</b>                         |            |       |            |       |          |
| Ever smoker                            | 3,368      | 39.0% | 5,275      | 61.0% | 0.000    |
| Never smoker                           | 1,707      | 39.5% | 2,615      | 60.5% |          |
| <b>Alcohol</b>                         |            |       |            |       |          |
| No                                     | 3,458      | 38.6% | 5,496      | 61.4% | 0.561    |
| Yes                                    | 1,614      | 40.4% | 2,377      | 59.6% |          |
| <b>BMI (mean, SD)</b>                  | 23.9 (5.2) |       | 24.1 (4.8) |       | 0.006    |
| <b>Physical activity</b>               |            |       |            |       |          |
| Low level                              | 1,475      | 35.3% | 2,707      | 64.7% | 0.000    |
| Moderate                               | 1,402      | 38.5% | 2,243      | 61.5% |          |
| High                                   | 2,198      | 42.8% | 2,939      | 57.2% |          |
| <b>Education</b>                       |            |       |            |       |          |
| No school                              | 2,399      | 42.8% | 3,201      | 57.2% | 0.000    |
| Primary                                | 956        | 36.7% | 1,646      | 63.3% |          |
| Middle                                 | 1,173      | 43.3% | 1,535      | 56.7% |          |
| Higher education                       | 904        | 37.9% | 1,481      | 62.1% |          |
| <b>Fruit and vegetable consumption</b> |            |       |            |       |          |
| Insufficient                           | 2,704      | 44.8% | 3,336      | 55.2% | 0.000    |
| Sufficient                             | 2,748      | 37.5% | 4,579      | 62.5% |          |
| <b>Fuel used at home</b>               |            |       |            |       |          |
| Clean                                  | 2,790      | 37.8% | 4,588      | 62.2% | 0.000    |
| Unclean                                | 2,650      | 44.8% | 3,265      | 55.2% |          |
| <b>Annual household income</b>         |            |       |            |       |          |
| ≤15,000¥                               | 3,147      | 47.1% | 3,529      | 52.9% | 0.000    |
| >15,000¥                               | 2,263      | 35.4% | 4,129      | 64.6% |          |
| <b>Location of residence</b>           |            |       |            |       |          |
| Rural                                  | 2,524      | 37.1% | 4,276      | 62.9% | 0.000    |
| Urban                                  | 2,928      | 44.6% | 3,639      | 55.4% |          |
